# Supplementary material for: Tiliroside Attenuates NLRP3 Inflammasome Activation in Macrophages and Protects against Acute Lung Injury in Mice
Source: MDPI journal article supplement (doi:10.3390/molecules28227527), 2023-11-10
Supplement: s1 [file s1]

# **Tiliroside Attenuates NLRP3 Inflammasome Activation in Macrophages and Protects against Acute Lung Injury in Mice**

**Chao Zhong <sup>1,†,\*</sup>, Jing Yang <sup>1,†</sup>, Keke Deng <sup>1</sup>, Xiaoya Lang <sup>1</sup>, Jiangtao Zhang <sup>1</sup>, Min Li <sup>2</sup>, Liang Qiu <sup>1</sup>,  
Guoyue Zhong <sup>2</sup> and Jun Yu <sup>3,\*</sup>**

<sup>1</sup> Center for Translational Medicine, College of Traditional Chinese Medicine, Jiangxi University of Chinese Medicine, Nanchang 330004, China

<sup>2</sup> Center for Traditional Chinese Medicine Resources and Ethnic Medicine, Jiangxi University of Chinese Medicine, Nanchang 330004, China

<sup>3</sup> Department of Cardiovascular Sciences and Center for Metabolic Disease Research, Lewis Katz School of Medicine, Temple University, Philadelphia, PA 19140, USA

\* Correspondence: 20181012@jxutcm.edu.cn (C.Z.); jun.yu@temple.edu (J.Y.)

† These authors contributed equally to this work.

**Supplementary Table S1:** Sequences of qRT-PCR primers used in this study

| Gene                          | Species     | Forward primer (5'-3')  | Reverse primer (5'-3')     |
|-------------------------------|-------------|-------------------------|----------------------------|
| <i>ACTB</i>                   | <i>Homo</i> | CTCACCATGGATGATGATATCGC | AGGAATCCTTCTGACCCATGC      |
| <i>IL6</i>                    | <i>Homo</i> | TGCAATAACCACCCCTGACC    | GTGCCCATGCTACATTTGCC       |
| <i>IL8</i>                    | <i>Homo</i> | AGCCTTCCTGATTTCTGCAG    | GTCCACTCTCAATCACTCTCAG     |
| <i>TNFA</i>                   | <i>Homo</i> | ACTTTGGAGTGATCGGCC      | GCTTGAGGGTTTGCTACAAC       |
| <i>CCL2</i>                   | <i>Homo</i> | TGTCCCAAAGAAGCTGTGATC   | ATTCTTGGGTTGTGGAGTGAG      |
| <i>Actb</i>                   | <i>Mus</i>  | CTTTGCCACGGACGAGAC      | TCATTGTACTCTGAGGGCTGAC     |
| <i>Il-6</i>                   | <i>Mus</i>  | GAACAACGATGATGCACTTGC   | CTTCATGTACTCCAGGTAGCTATGGT |
| <i>Cxcl-2</i>                 | <i>Mus</i>  | CCAACCACCAGGCTACAGG     | GCGTCACACTCAAGCTCTG        |
| <i>Il-1<math>\beta</math></i> | <i>Mus</i>  | AGTTGACGGACCCCAAAAG     | AGCTGGATGCTCTCATCAGG       |
| <i>Inos</i>                   | <i>Mus</i>  | CTTTGCCACGGACGAGAC      | TCATTGTACTCTGAGGGCTGAC     |

## Supplementary Figure S1

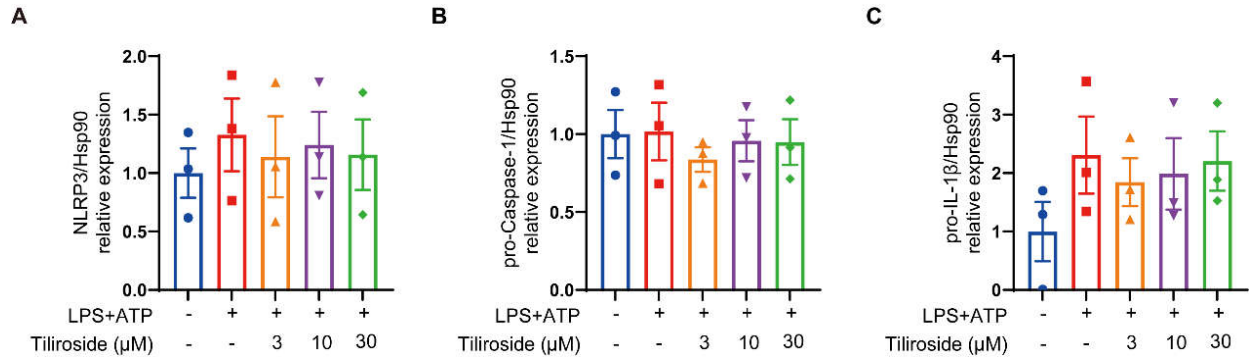

**Figure S1. The effect of tiliroside on the expression of NLRP3, pro-Caspase-1, and pro-IL-1β in LPS plus ATP-induced THP-1 macrophages. (A-C)** THP-1 macrophages were pretreated with tiliroside or a vehicle for 24 h and then stimulated with LPS (2 μg/mL) for 5 h, followed by ATP (5 mM) treatment for 45 min. NLRP3 **(A)**, pro-Caspase-1 **(B)**, and pro-IL-1β **(C)** expression were determined by Western blotting, and the relative expression levels were quantified (n=3). Data are mean ± SEM. These data are related to Figure 1C.

Supplementary Figure S2

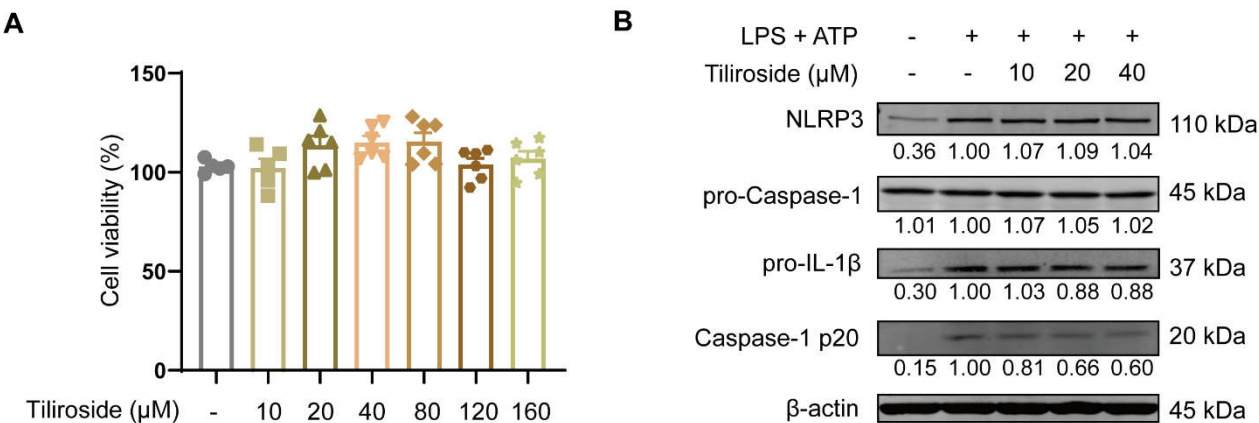

**Figure S2. Tiliroside inhibits NLRP3 inflammasome activation in BMDMs. (A)** Cell viability was measured by CCK-8 assay using BMDMs treated with different concentrations of tiliroside for 30 h. **(B)** BMDMs were pretreated with tiliroside or a vehicle for 24 h and then stimulated with LPS (100 ng/ml) for 5 h, followed by ATP (5 mM) treatment for 30 min. Protein levels of Caspase-1 p20, NLRP3, pro-Caspase-1, and pro-IL-1β in cell lysates were determined by Western blotting.

### Supplementary Figure S3

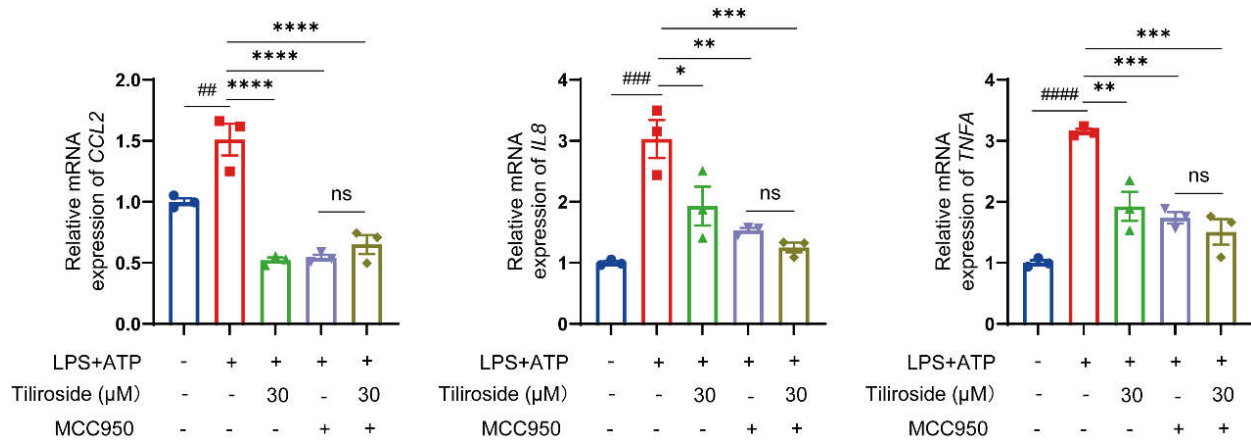

**Figure S3. The effect of tiliroside on the expression of pro-inflammatory mediators can be blocked by NLRP3 inhibitor MCC950.** THP-1 macrophages were pretreated with tiliroside (30 μM) for 23 h, followed by co-treatment with MCC950 (0.01 μM) for an additional 1 h, and then stimulated with LPS (2 μg/ml) for 5 h, followed by ATP (5 mM) treatment for 45 min. CCL2, IL-8, and TNFA gene expression levels were analyzed by qRT-PCR (n=3). Data are mean ± SEM.  $##P < 0.01$ ,  $###P < 0.001$ ,  $####P < 0.0001$ ,  $*P < 0.05$ ,  $**P < 0.01$ ,  $***P < 0.001$ ,  $****P < 0.0001$ .

## Supplementary Figure S4

**A**

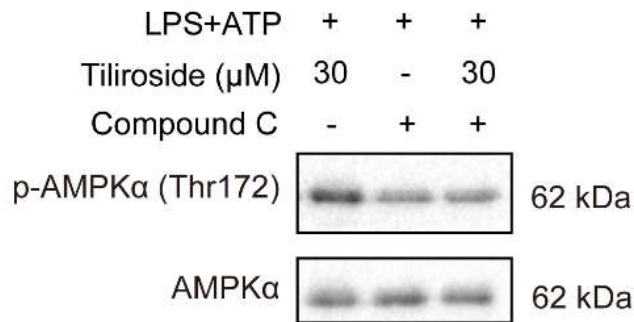

**B**

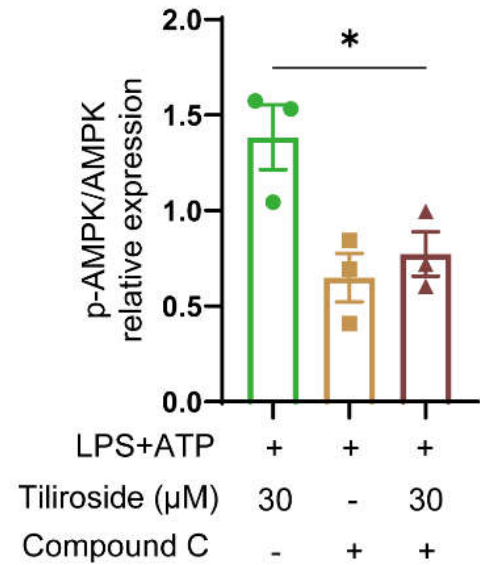

**Figure S4. Compound C blocks AMPK activation in THP-1 macrophages.** THP-1 macrophages were pretreated with tiliroside (30  $\mu$ M) for 22 h, followed by co-treatment with Compound C for an additional 2 h, and then stimulated with LPS (2  $\mu$ g/ml) for 5 h, followed by ATP (5 mM) treatment for 45 min. **(A, B)** Protein levels of p-AMPK $\alpha$  (Thr172) and AMPK $\alpha$  were determined by Western blotting **(A)** and quantification of p-AMPK $\alpha$  (Thr172) normalized to total AMPK $\alpha$  (n=3) **(B)**. Data are mean  $\pm$  SEM. \* $P$  < 0.05.

## Supplementary Figure S5

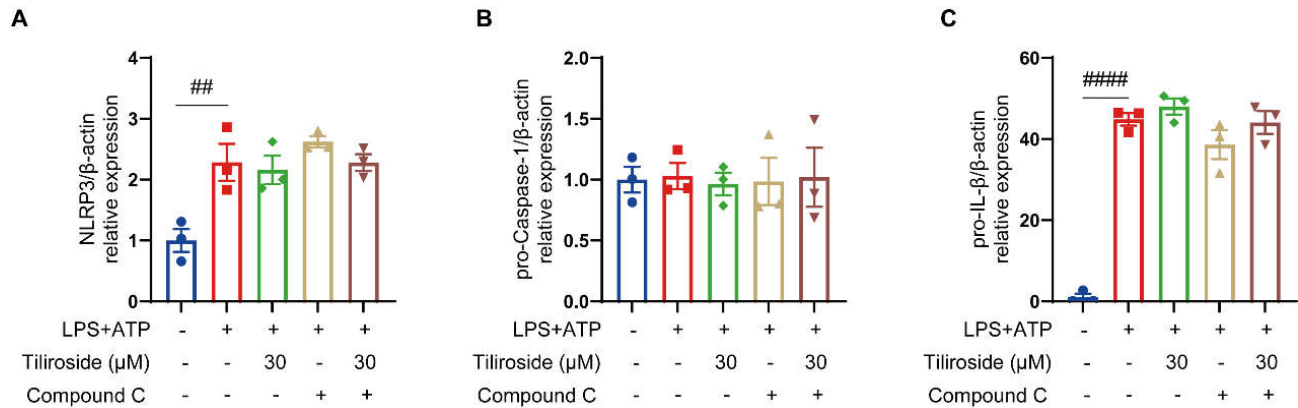

**Figure S5. The effect of Compound C on tiliroside-mediated regulation of NLRP3, pro-Caspase-1, and pro-IL-1β in LPS plus ATP-induced THP-1 macrophages. (A-C)** THP-1 macrophages were pretreated with tiliroside (30 μM) for 22 h, followed by co-treatment with Compound C for an additional 2 h, and then stimulated with LPS (2 μg/mL) for 5 h, followed by ATP (5 mM) treatment for 45 min. NLRP3 **(A)**, pro-Caspase-1 **(B)**, and pro-IL-1β **(C)** were determined by Western blotting, and the relative expression levels were quantified (n=3). Data are mean ± SEM.  $^{##}P < 0.01$ ,  $^{####}P < 0.0001$ . These data are related to Figure 3A.
